# Supplementary material for: The current landscape of predictive and prognostic biomarkers for immune checkpoint blockade in ovarian cancer
Source: Front Immunol. 2022 Oct 27;13:1045957. doi: 10.3389/fimmu.2022.1045957 (PMC9647049; doi:10.3389/fimmu.2022.1045957)
Supplement: Supplementary file 1 [file Table_1.xlsx]

## Sheet: Sheet1
Supplementary Table S1. Clinical trials and researches on biomarker evaluation for checkpoint immunotherapy in ovarian cancer
Factor	Biomarker	Association with favorable clinical outcome	Predictive versus prognostic	Tissue type for biomarker assessment	Possible assay type for biomarker assessment	Trial	Title	Status	Study Results	Conditions	Interventions	Drug	Treatment strategy	References
PD-L1	tumor PD-L1 expression	positive	predictive	tumor	IHC	NCT02674061	Efficacy and Safety Study of Pembrolizumab (MK-3475) in Participants With Advanced Recurrent Ovarian Cancer (MK-3475-100/KEYNOTE-100)	Completed	Has Results	Ovarian Neoplasms	Biological: Pembrolizumab	pembrolizumab	monotherapy	Matulonis et al., 2019
	tumor PD-L1 expression	positive	predictive	tumor	IHC	NCT02674061	Efficacy and Safety Study of Pembrolizumab (MK-3475) in Participants With Advanced Recurrent Ovarian Cancer (MK-3475-100/KEYNOTE-100)	Completed	Has Results	Ovarian Neoplasms	Biological: Pembrolizumab	pembrolizumab	monotherapy	Matulonis et al., 2020
	tumor PD-L1 expression	positive	predictive	tumor	IHC	NCT02674061	Efficacy and Safety Study of Pembrolizumab (MK-3475) in Participants With Advanced Recurrent Ovarian Cancer (MK-3475-100/KEYNOTE-100)	Completed	Has Results	Ovarian Neoplasms	Biological: Pembrolizumab	pembrolizumab	monotherapy	Nishio et al., 2020
	tumor PD-L1 expression	positive	both	tumor	IHC	NCT02335918	A Dose Escalation and Cohort Expansion Study of Anti-CD27 (Varlilumab) and Anti-PD-1 (Nivolumab) in Advanced Refractory Solid Tumors	Completed	No Results Available	Squamous Cell Carcinoma of the Head and Neck (SCCHN)|Ovarian Carcinoma-Enrollment Completed|Colorectal Cancer (CRC)-Enrollment Completed|Renal Cell Carcinoma (RCC) (Phase ll Only)|Glioblastoma (GBM) (Phase ll Only)-Enrollment Completed	Drug: Combination of varlilumab and nivolumab	varlilumab + nivolumab	combination therapy	Sanborn et al., 2022; Sanborn et al., 2018
	PD-L1 expression both in tumor cells and immune cells	positive	both	tumor	IHC	NCT02580058	A Study Of Avelumab Alone Or In Combination With Pegylated Liposomal Doxorubicin Versus Pegylated Liposomal Doxorubicin Alone In Patients With Platinum Resistant/Refractory Ovarian Cancer (JAVELIN Ovarian 200)	Completed	Has Results	Ovarian Cancer	Biological: avelumab|Drug: PLD	avelumab vs. avelumab+ PLD vs. PLD	combination therapy	Pujade-Lauraine et al., 2021
	tumor PD-L1 expression	potentially positive	predictive	tumor	-	NCT03558139	Trial of Magrolimab (Hu5F9-G4) in Combination With Avelumab in Solid Tumor Participants and Checkpoint-Inhibitor-Naive Ovarian Cancer Participants Who Progress Within 6 Months of Prior Platinum Chemotherapy	Completed	No Results Available	Ovarian Cancer	Drug: Magrolimab|Drug: Avelumab	magrolimab + avelumab	combination therapy	Lakhani et al., 2020
	tumor PD-L1 expression	potentially positive	predictive	tumor	IHC; TIL analysis	NCT02865811	Pembrolizumab Combined With PLD For Recurrent Platinum Resistant Ovarian, Fallopian Tube Or Peritoneal Cancer	Completed	Has Results	Ovarian Cancer|Fallopian Tube Cancer|Peritoneal Cancer	Drug: Pembrolizumab|Drug: Pegylated Liposomal Doxorubicin (PLD)	pembrolizumab + PLD	combination therapy	Lee et al., 2020
	tumor PD-L1 expression	negative	predictive	tumor	IHC	NCT02873962	A Phase II Study Of Nivolumab/ Bevacizumab/Rucaparib	Recruiting	No Results Available	Peritoneal Cancer|Ovarian Cancer|Fallopian Tube Cancer	Drug: Bevacizumab|Drug: Nivolumab|Drug: Rucaparib	nivolumab + bevacizumab	combination therapy	Liu et al., 2019
	tumor PD-L1 expression	no association	-	tumor	IHC	NCT02853318	Pembrolizumab, Bevacizumab, and Cyclophosphamide in Treating Patients With Recurrent Ovarian, Fallopian Tube, or Primary Peritoneal Cancer	Completed	Has Results	Fallopian Tube Clear Cell Adenocarcinoma|Fallopian Tube Endometrioid Adenocarcinoma|Fallopian Tube Mucinous Adenocarcinoma|Fallopian Tube Serous Adenocarcinoma|Ovarian Clear Cell Adenocarcinoma|Ovarian Endometrioid Adenocarcinoma|Ovarian Mucinous Adenocarcinoma|Ovarian Serous Adenocarcinoma|Primary Peritoneal Serous Adenocarcinoma|Recurrent Fallopian Tube Carcinoma|Recurrent Ovarian Carcinoma|Rec…	Biological: Bevacizumab|Drug: Cyclophosphamide|Other: Laboratory Biomarker Analysis|Biological: Pembrolizumab	pembrolizumab + bevacizumab + oral metronomic cyclophosphamide	combination therapy	Zsiros et al., 2021
	PD-L1 expression on tumor cells	no association	-	tumor	IHC	NCT02608684	A Study of Pembrolizumab With Standard Treatment in Patients With Recurrent Platinum-resistant Ovarian Cancer	Completed	Has Results	Ovarian Cancer	Drug: Pembrolizumab|Drug: Gemcitabine|Drug: Cisplatin	pembrolizumab + cisplatin + gemcitabine	combination therapy	Walsh et al., 2021
	PD-L1 expression both in tissue and tumor-infiltrating immune cells	no association	-	tumor	IHC	NCT02498600	Nivolumab With or Without Ipilimumab in Treating Patients With Persistent or Recurrent Epithelial Ovarian, Primary Peritoneal, or Fallopian Tube Cancer	Active, not recruiting	Has Results	Recurrent Fallopian Tube Carcinoma|Recurrent Ovarian Carcinoma|Recurrent Primary Peritoneal Carcinoma	Biological: Ipilimumab|Biological: Nivolumab	nivolumab vs. nivolumab+ ipilimumab	combination therapy	Zamarin et al., 2020
	tumor PD-L1 expression	no association	-	tumor	IHC	NCT01772004	Avelumab in Metastatic or Locally Advanced Solid Tumors (JAVELIN Solid Tumor)	Completed	Has Results	Solid Tumors	Drug: Avelumab	avelumab	monotherapy	Disis et al., 2016; Disis et al., 2019
	tumor PD-L1 expression	no association	-	tumor	IHC	NCT03267589	Trial in Patients With Relapsed Ovarian Cancer	Completed	No Results Available	Ovarian Cancer	Drug: Durvalumab, Tremelilumab, MEDI 9447, MEDI 0562	durvalumab + oleclumab	combination therapy	Mirza et al., 2021
	tumor PD-L1 expression	no association	-	tumor	IHC	NCT02484404	Phase I/II Study of the Anti-Programmed Death Ligand-1 Durvalumab Antibody (MEDI4736) in Combination With Olaparib and/or Cediranib for Advanced Solid Tumors and Advanced or Recurrent Ovarian, Triple Negative Breast, Lung, Prostate and Colorectal Can...	Recruiting	No Results Available	Colorectal Neoplasms|Breast Neoplasms	Drug: Olaparib|Drug: Cediranib|Drug: Durvalumab	durvalumab + olaparib/cediranib	combination therapy	Lee et al., 2017
	tumor PD-L1 expression	no association	-	tumor	IHC	NCT02484404	Phase I/II Study of the Anti-Programmed Death Ligand-1 Durvalumab Antibody (MEDI4736) in Combination With Olaparib and/or Cediranib for Advanced Solid Tumors and Advanced or Recurrent Ovarian, Triple Negative Breast, Lung, Prostate and Colorectal Can...	Recruiting	No Results Available	Colorectal Neoplasms|Breast Neoplasms	Drug: Olaparib|Drug: Cediranib|Drug: Durvalumab	durvalumab + olaparib	combination therapy	Lampert et al., 2020
	tumor PD-L1 expression	-	-	tumor	IHC	NCT03353831	Atezolizumab With Bevacizumab and Chemotherapy vs Bevacizumab and Chemotherapy in Early Relapse Ovarian Cancer	Active, not recruiting	No Results Available	Recurrent Ovarian Carcinoma	Drug: Bevacizumab|Drug: Atezolizumab|Drug: Chemotherapy|Drug: Placebos	atezolizumab + bevacizumab + chemotherapy vs. bevacizumab + chemotherapy	combination therapy	Marme et al., 2019
	tumor PD-L1 expression	-	-	tumor	-	NCT03740165	Study of Chemotherapy With Pembrolizumab (MK-3475) Followed by Maintenance With Olaparib (MK-7339) for the First-Line Treatment of Women With BRCA Non-mutated Advanced Epithelial Ovarian Cancer (EOC) (MK-7339-001/KEYLYNK-001/ENGOT-ov43/GOG-3036)	Active, not recruiting	No Results Available	Ovarian Cancer|Fallopian Tube Cancer|Peritoneal Neoplasms	Biological: Pembrolizumab|Drug: Placebo for pembrolizumab|Drug: Carboplatin|Drug: Paclitaxel|Drug: Olaparib|Drug: Placebo for olaparib|Biological: Bevacizumab|Drug: Docetaxel	1) pembrolizumab + olaparib 2) pembrolizumab + placebo for olaparib 3) placebo for pembrolizumab + placebo for olaparib	combination therapy	Fujiwara et al., 2019
	tumor PD-L1 expression	-	-	tumor	IHC	NCT02657889	Niraparib in Combination With Pembrolizumab in Patients With Triple-negative Breast Cancer or Ovarian Cancer	Completed	Has Results	Neoplasms|Triple Negative Breast Cancer|Ovarian Cancer|Breast Cancer|Metastatic Breast Cancer|Advanced Breast Cancer|Stage IV Breast Cancer|Fallopian Tube Cancer|Peritoneal Cancer	Drug: niraparib|Biological: pembrolizumab	niraparib + pembrolizumab	combination therapy	Konstantinopoulos et al., 2019
	PD-L1 expression both in tumor cells and immune cells	-	-	tumor	IHC; Tissue expression of immune regulators	NCT02580058	A Study Of Avelumab Alone Or In Combination With Pegylated Liposomal Doxorubicin Versus Pegylated Liposomal Doxorubicin Alone In Patients With Platinum Resistant/Refractory Ovarian Cancer (JAVELIN Ovarian 200)	Completed	Has Results	Ovarian Cancer	Biological: avelumab|Drug: PLD	avelumab vs. avelumab + PLD vs. PLD	combination therapy	Pujade-Lourraine et al., 2016; Yonemori et al., 2019
	tumor PD-L1 expression	-	-	tumor	-	NCT02963831	A Phase 1/2 Study to Investigate the Safety, Biologic and Anti-tumor Activity of ONCOS-102 in Combination With Durvalumab in Subjects With Advanced Peritoneal Malignancies	Completed	No Results Available	Colorectal Cancer|Platinum-resistant Ovarian Cancer|Appendiceal Cancer	Biological: ONCOS-102|Drug: Durvalumab	durvalumab+ ONCOS-102	combination therapy	Zamarin et al., 2020
	tumor PD-L1 expression	-	-	tumor	IHC	NCT02725489	Pilot Study of Durvalumab and Vigil in Advanced Women's Cancers	Completed	No Results Available	Breast Cancer|Ovarian Cancer|Fallopian Tube Cancer|Primary Peritoneal Carcinoma|Uterine Cancer|Cervical Cancer|Endometrial Cancer	Biological: Vigil|Drug: Durvalumab	durvalumab+ gemogenovatucel-T (Vigil)	combination therapy	Barve et al., 2022
	tumor and serum PD-L1 levels	-	-	tumor and serum	-	NCT01975831	A Phase 1 Study to Evaluate MEDI4736 in Combination With Tremelimumab	Completed	Has Results	Breast Cancer|Ovarian Cancer|Colorectal Cancer|Cervical Cancer|Renal Cell Carcinoma	Drug: Durvalumab|Drug: Tremelimumab	tremelimumab + MEDI4736	combination therapy	Callahan et al., 2014; Callahan et al., 2017
TIICs	immune cell infiltration	positive	prognostic	tumor	RNA-seq	-	-	-	-	-	-	-	-	Liu et al., 2021
	CD8 expression	positive	both	tumor	IHC	NCT02580058	A Study Of Avelumab Alone Or In Combination With Pegylated Liposomal Doxorubicin Versus Pegylated Liposomal Doxorubicin Alone In Patients With Platinum Resistant/Refractory Ovarian Cancer (JAVELIN Ovarian 200)	Completed	Has Results	Ovarian Cancer	Biological: avelumab|Drug: PLD	avelumab vs. avelumab+ PLD vs. PLD	combination therapy	Pujade-Lauraine et al., 2021
	immune score	positive	both	tumor	NanoString	NCT02657889	Niraparib in Combination With Pembrolizumab in Patients With Triple-negative Breast Cancer or Ovarian Cancer	Completed	Has Results	Neoplasms|Triple Negative Breast Cancer|Ovarian Cancer|Breast Cancer|Metastatic Breast Cancer|Advanced Breast Cancer|Stage IV Breast Cancer|Fallopian Tube Cancer|Peritoneal Cancer	Drug: niraparib|Biological: pembrolizumab	niraparib + pembrolizumab	combination therapy	Färkkilä et al., 2020
	stromal tumor infiltrating mast cells (sTIMs)	negative	prognostic	tumor	IHC	-	-	-	-	-	-	-	-	Cao et al., 2021
	CD8 expression	no association	-	tumor	IHC	NCT03267589	Trial in Patients With Relapsed Ovarian Cancer	Completed	No Results Available	Ovarian Cancer	Drug: Durvalumab, Tremelilumab, MEDI 9447, MEDI 0562	durvalumab + oleclumab	combination therapy	Mirza et al., 2021
	tumor-infiltrating lymphocytes	no association	-	tumor	IHC	NCT02484404	Phase I/II Study of the Anti-Programmed Death Ligand-1 Durvalumab Antibody (MEDI4736) in Combination With Olaparib and/or Cediranib for Advanced Solid Tumors and Advanced or Recurrent Ovarian, Triple Negative Breast, Lung, Prostate and Colorectal Can...	Recruiting	No Results Available	Colorectal Neoplasms|Breast Neoplasms	Drug: Olaparib|Drug: Cediranib|Drug: Durvalumab	durvalumab + olaparib/cediranib	combination therapy	Lee et al., 2017
	tumor-infiltrating lymphocyte	no association	-	serum	IHC	NCT02484404	Phase I/II Study of the Anti-Programmed Death Ligand-1 Durvalumab Antibody (MEDI4736) in Combination With Olaparib and/or Cediranib for Advanced Solid Tumors and Advanced or Recurrent Ovarian, Triple Negative Breast, Lung, Prostate and Colorectal Can...	Recruiting	No Results Available	Colorectal Neoplasms|Breast Neoplasms	Drug: Olaparib|Drug: Cediranib|Drug: Durvalumab	durvalumab + olaparib	combination therapy	Lampert et al., 2020
	tumor infiltrating CD8+ T lymphocytes	-	-	tumor	IHC; Tissue expression of immune regulators	NCT02580058	A Study Of Avelumab Alone Or In Combination With Pegylated Liposomal Doxorubicin Versus Pegylated Liposomal Doxorubicin Alone In Patients With Platinum Resistant/Refractory Ovarian Cancer (JAVELIN Ovarian 200)	Completed	Has Results	Ovarian Cancer	Biological: avelumab|Drug: PLD	avelumab vs. avelumab+ PLD vs. PLD	combination therapy	Pujade-Lourraine et al., 2016; Yonemori et al., 2019
	tumor-infiltrating immune cells	-	-	tumor	-	NCT02963831	A Phase 1/2 Study to Investigate the Safety, Biologic and Anti-tumor Activity of ONCOS-102 in Combination With Durvalumab in Subjects With Advanced Peritoneal Malignancies	Completed	No Results Available	Colorectal Cancer|Platinum-resistant Ovarian Cancer|Appendiceal Cancer	Biological: ONCOS-102|Drug: Durvalumab	durvalumab+ ONCOS-102	combination therapy	Zamarin et al., 2020
	immune cell phenotypes	-	-	-	-	NCT01975831	A Phase 1 Study to Evaluate MEDI4736 in Combination With Tremelimumab	Completed	Has Results	Breast Cancer|Ovarian Cancer|Colorectal Cancer|Cervical Cancer|Renal Cell Carcinoma	Drug: Durvalumab|Drug: Tremelimumab	tremelimumab + MEDI4736	combination therapy	Callahan et al., 2014; Callahan et al., 2017
Mutation and genomics alteration	the ratio of peripheral CD8 +PD1+Ki67+ T cells to TMB	positive	prognostic	peripheral blood	DNA sequencing	NCT03029598	Pembrolizumab and Carboplatin in Treating Patients With Relapsed or Refractory Ovarian, Fallopian Tube, or Primary Peritoneal Cancer	Completed	Has Results	Recurrent Fallopian Tube Carcinoma|Recurrent Ovarian Carcinoma|Recurrent Primary Peritoneal Carcinoma	Drug: Carboplatin|Other: Laboratory Biomarker Analysis|Biological: Pembrolizumab	carboplatin + atezolizumab	combination therapy	Liao et al., 2021
	ARID1A loss/mutation	positive	predictive	tumor	DNA sequencing	-	-	-	-	-	-	-	-	Kuroda et al., 2021
	mutational signature 3	positive	both	tumor	DNA sequencing	NCT02657889	Niraparib in Combination With Pembrolizumab in Patients With Triple-negative Breast Cancer or Ovarian Cancer	Completed	Has Results	Neoplasms|Triple Negative Breast Cancer|Ovarian Cancer|Breast Cancer|Metastatic Breast Cancer|Advanced Breast Cancer|Stage IV Breast Cancer|Fallopian Tube Cancer|Peritoneal Cancer	Drug: niraparib|Biological: pembrolizumab	niraparib + pembrolizumab	combination therapy	Färkkilä et al., 2020
	fraction of genome altered (FGA)	positive	both	tumor	DNA sequencing	-	-	-	-	-	-	-	-	Liu et al., 2020
	TMB	no association	both	tumor	DNA sequencing	-	-	-	-	-	-	-	-	Liu et al., 2020
	homologous recombination DNA repair deficiencies (HRDs)	no association	both	tumor	DNA sequencing	-	-	-	-	-	-	-	-	Liu et al., 2020
	tumor microenvironment	-	-	-	-	NCT01975831	A Phase 1 Study to Evaluate MEDI4736 in Combination With Tremelimumab	Completed	Has Results	Breast Cancer|Ovarian Cancer|Colorectal Cancer|Cervical Cancer|Renal Cell Carcinoma	Drug: Durvalumab|Drug: Tremelimumab	tremelimumab + MEDI4736	combination therapy	Callahan et al., 2014; Callahan et al., 2017
Transcriptomic signature	APOBEC3A expression	positive	both	tumor	qPCR	-	-	-	-	-	-	-	-	Xu et al., 2021
	immune-related genes	positive	prognostic	tumor	RNA-seq	-	-	-	-	-	-	-	-	Li et al., 2021
	signal transducer and activator of transcription 1 (STAT1)	potentially positive	predictive	tumor	qPCR	-	-	-	-	-	-	-	-	Liu et al., 2020
	CAPG expression	negative	both	tumor	RNA-seq	-	-	-	-	-	-	-	-	Jiang et al., 2022
	LAYN expression	negative	both	tumor	RNA-seq	-	-	-	-	-	-	-	-	Li et al., 2022
	TGF-β score	negative	prognostic	tumor	RNA-seq	-	-	-	-	-	-	nivolumab/nivolumab/pembrolizumab	-	Ni et al., 2021
	NAD+ metabolism-related genes (NMRGs)	negative	both	tumor	RNA-seq	-	-	-	-	-	-	-	-	Lin et al., 2022
	m6A-related gene signature	potentially negative	both	tumor	qPCR	-	-	-	-	-	-	-	-	Tan et al., 2022
	CXCL9	positive	prognostic	tumor	IHC	-	-	-	-	-	-	-	-	Seitz et al., 2022
	CXCL11	positive	both	tumor	RNA seq	-	-	-	-	-	-	-	-	Shi et al., 2021
	CXCL13	positive	both	tumor	IHC; IF	-	-	-	-	-	-	-	-	Yang et al., 2021
	CXCL13	potentially positive	both	tumor	RNA seq	-	-	-	-	-	-	-	-	Fan et al., 2021
Peripheral blood biomarkers	increased IFNγ production	no association	-	blood	RNA seq	NCT02484404	Phase I/II Study of the Anti-Programmed Death Ligand-1 Durvalumab Antibody (MEDI4736) in Combination With Olaparib and/or Cediranib for Advanced Solid Tumors and Advanced or Recurrent Ovarian, Triple Negative Breast, Lung, Prostate and Colorectal Can...	Recruiting	No Results Available	Colorectal Neoplasms|Breast Neoplasms	Drug: Olaparib|Drug: Cediranib|Drug: Durvalumab	durvalumab + olaparib	combination therapy	Lampert et al., 2020
	increased levels of CA-125	negative	predictive	blood	CA-125 test	-	-	-	-	-	-	-	-	Boland et al., 2020
	reduced levels of CA-125	potentially negative	predictive	blood	CA-125 test	NCT01772004	Avelumab in Metastatic or Locally Advanced Solid Tumors (JAVELIN Solid Tumor)	Completed	Has Results	Solid Tumors	Drug: Avelumab	avelumab	monotherapy	Disis et al., 2019
	CA-125	no association	-	blood	CA-125 test	NCT02498600	Nivolumab With or Without Ipilimumab in Treating Patients With Persistent or Recurrent Epithelial Ovarian, Primary Peritoneal, or Fallopian Tube Cancer	Active, not recruiting	Has Results	Recurrent Fallopian Tube Carcinoma|Recurrent Ovarian Carcinoma|Recurrent Primary Peritoneal Carcinoma	Biological: Ipilimumab|Biological: Nivolumab	nivolumab vs. nivolumab+ ipilimumab	combination therapy	Zamarin et al., 2020
	elevated VEGFR3 levels	negative	-	blood	RNA seq	NCT02484404	Phase I/II Study of the Anti-Programmed Death Ligand-1 Durvalumab Antibody (MEDI4736) in Combination With Olaparib and/or Cediranib for Advanced Solid Tumors and Advanced or Recurrent Ovarian, Triple Negative Breast, Lung, Prostate and Colorectal Can...	Recruiting	No Results Available	Colorectal Neoplasms|Breast Neoplasms	Drug: Olaparib|Drug: Cediranib|Drug: Durvalumab	durvalumab + olaparib	combination therapy	Lampert et al., 2020
	ctDNA	negative	both	blood	bespoke ctDNA assays	NCT02644369	Study of the Effects of Pembrolizumab in Patients With Advanced Solid Tumors	Active, not recruiting	No Results Available	Squamous Cell Cancer of Head and Neck|Triple Negative Breast Cancer|Epithelial Ovarian Cancer|Malignant Melanoma|Advanced Solid Tumors	Biological: Pembrolizumab	pembrolizumab	monotherapy	Bratman et al., 2020
Abbreviations: IHC, immunohistochemistry; IF, immunofluorescence; TIICs, tumor-infiltrating immune cells; PLD, pegylated liposomal doxorubicin; CA-125, cancer antigen-125; ctDNA, circulating tumor DNA; +, combination therapy; -, not available; /, or.
